1 TITLE: A prospective role for the rumen in generating antibiotic resistance

2

3 Cameron R. Strachan<sup>1,4,\*</sup>, Anna J. Mueller<sup>2</sup>, Mahdi Ghanbari<sup>3</sup>, Viktoria Neubauer<sup>4</sup>, Benjamin  
4 Zwirzitz<sup>1,4</sup>, Sarah Thalgueter<sup>1,4</sup>, Monika Dziecol<sup>4</sup>, Stefanie U. Wetzels<sup>4</sup>, Jürgen Zanghellini<sup>5,6,7</sup>,  
5 Martin Wagner<sup>1,4</sup>, Stephan Schmitz-Esser<sup>8</sup>, Evelyne Mann<sup>4</sup>

6

7 <sup>1</sup>FFoQSI GmbH, Technopark 1C, 3430 Tulln, Austria

8 <sup>2</sup>University of Vienna, Centre for Microbiology and Environmental Systems Science,  
9 Division of Microbial Ecology, Althanstrasse 14, 1090 Vienna, Austria

10

11 <sup>3</sup>BIOMIN Research Center, Technopark 1, 3430, Tulln, Austria

12

13 <sup>4</sup>Institute of Food Safety, Food Technology and Veterinary Public Health, Department for Farm  
14 Animals and Public Health, University of Veterinary Medicine Vienna, Veterinärplatz 1, 1210  
15 Vienna, Austria

16

17 <sup>5</sup>Austrian Centre of Industrial Biotechnology, 1190 Vienna, Austria

18

19 <sup>6</sup>Department of Biotechnology, University of Natural Resources and Life Sciences, Vienna, 1190  
20 Vienna, Austria

21

22 <sup>7</sup>Austrian Biotech University of Applied Sciences, 3430 Tulln, Austria

23

24 <sup>8</sup>Department of Animal Science, Iowa State University, 3222 National Swine Research and  
25 Information Center, 1029 North University Blvd, Ames, IA 50011-3611, USA.

26

27 \*Author correspondence: [cameron.strachan@vetmeduni.ac.at](mailto:cameron.strachan@vetmeduni.ac.at)

28

29 ABSTRACT

30

31 Antibiotics were a revolutionary discovery of the 20<sup>th</sup> century, but the ability of bacteria to  
32 spread the genetic determinants of resistance via horizontal gene transfer (HGT) has quickly  
33 endangered their use<sup>1</sup>. Indeed, there is a global network of microbial gene exchange, the analysis  
34 of which has revealed particularly frequent transfer of resistance determinants between farm  
35 animals and human-associated bacteria<sup>2</sup>. Here, we leverage the recent release of a rumen  
36 microbial genome reference set and show that the wide-spread resistance gene cluster *aadE-sat4-  
37 aphA-3* is harboured in ruminal Bacteroidetes. While this cluster appears to have been recently  
38 transferred between commensal bacteria in the rumen and many diverse animal and human  
39 pathogens, comparative analysis suggests that the cluster stabilized in the pathogens. Then,  
40 focusing on streptomycin resistance, it was found that homologues from the rumen span much of  
41 the known diversity of aminoglycoside O-nucleotidyltransferases (AadEs) and that distinct  
42 variants of the enzyme are present in a single rumen bacterial genome. Notably, a second variant  
43 of AadE has also been recently transferred, albeit more often as a single gene, throughout a  
44 different set of animal and human associated bacteria. By examining the synteny of AadE  
45 orthologues in various bacterial genomes and analyzing corresponding gene trees in an

46 environmental context, we speculate that the ruminant associated microbiome has a salient role  
47 in the emergence of specific resistance variants and clusters. In light of the recent literature on  
48 the evolutionary origin of antibiotic resistance, we further suggest that the rumen provides a  
49 possible route of dissemination of resistance genes from soil resistomes, throughout the farm,  
50 and to human pathogens<sup>3</sup>.

51

## 52 MAIN TEXT

53

54 Since the introduction of antibiotics in 1937, the emergence and spread of antibiotic resistance  
55 determinants (ARDs) has become one of the largest threats to human health<sup>1,4</sup>. In fact, the history  
56 of antibiotic use is concurrent with the history of increasing antibiotic resistance (AR), which  
57 now vastly outpaces new antibiotic discovery<sup>5</sup>. Considering the lack of new antimicrobial  
58 compounds entering the clinic, there have been many renewed calls for efforts to discover new  
59 compounds or to return to modifying well-understood classes of antibiotics, such as the  
60 aminoglycosides<sup>5-8</sup>. In addition to restricting the use of current and future antibiotics, there is a  
61 need to better understand the extensive evolutionary history of specific ARDs and their routes of  
62 dissemination<sup>3,9-11</sup>. In doing so, attempting to re-trace evolutionary events involving ARDs and  
63 resistance clusters will be essential to move from the metagenomic description of AR reservoirs  
64 to identifying particular sources where AR variants emerge, assemble into clusters, and  
65 subsequently transfer to human pathogens<sup>12,13</sup>. Fortunately, the ability to carry out such analysis  
66 is constantly improving with the number of publicly available genome sequences<sup>14</sup>. Recently,  
67 several high-quality datasets containing hundreds of bacterial and archaeal genomes from the  
68 rumen microbiome have been published, such as the Hungate1000 collection<sup>15,16</sup>.

69

70 In order to search for ARDs that may form clusters in commensal rumen bacteria, we first  
71 collected prokaryotic genome sequences from cultured organisms and combined them with a set  
72 of metagenome assembled genomes (MAGs), all sourced from the rumen<sup>15,16</sup>. This led to a total  
73 of 1585 genomes (453 genomes from cultured organisms and 1133 MAGs). Predicted open  
74 reading frames (ORFs) from this dataset were then compared to the comprehensive antibiotic  
75 resistance database (CARD) and it was noticed that 2 characterized ARDs from the antibiotic  
76 inactivation category, AadE and AphA-3 from *Streptococcus oralis* and *Campylobacter coli*,  
77 respectively, each shared 100% amino acid identity with an ORF from three different genomes in  
78 the rumen dataset<sup>17</sup>. In all three genomes, these two ORFs were proximal on the same contig,  
79 indicating that they may be organized in a cluster (Table S1). Two of the genomes derive from  
80 different species of *Bacteroides* from cows in the US, while the third came from a MAG  
81 classified as *Prevotella* sampled from a cow in Scotland. When compared at the nucleotide level,  
82 the three contigs identified from the rumen bacterial genomes shared a region of approximately  
83 ~10kB at 100% nucleotide identity, which upon further annotation, was found to contain the  
84 well-known aminoglycoside-streptothricin AR cluster *aadE-sat4-aphA-3*<sup>18</sup>. This cluster was  
85 originally identified as the transposon Tn5405 in *Staphylococcus aureus* and the genes *aadE*,  
86 *sat4*, and *aphA-3* encode for an aminoglycoside O-nucleotidyltransferase, a streptothricin N-  
87 acetyltransferase and a aminoglycoside O-phosphotransferase, respectively (Figure 1)<sup>19,20</sup>. The  
88 Tn5405 sequence itself is also among those conserved at 100% nucleotide identity and to date,  
89 the cluster has been observed across a wide range of human and animal pathogens<sup>18-27</sup>. When  
90 compared to the NCBI non-redundant nucleotide database, it was found that a highly-conserved  
91 region that spanned ~6kB of the ~10kB region was present in a diverse set of pathogens (Figure

92 1A, Table S2). The segment of this ~6kB which contained the *aadE-sat4-aphA-3* cluster ranged  
93 from 99.8-100% nucleotide identity in 32 unique sequences as compared to the rumen sourced  
94 contigs, while the flanking regions ranged from 89.9-100% (Figure 1A). Interestingly, the  
95 regions that were missing in the pathogens as compared to the rumen bacterial genomes  
96 contained only annotated transposases, including a transposase located between *aphA-3* and *sat4*  
97 in the cluster, indicating that the cluster has stabilized in the pathogens (Figure 1B, Table S3)<sup>28</sup>.  
98 It is worth noting that the only example found where the cluster was not shared as a whole was in  
99 *Bacteroides fragilis*, a common reservoir of AR and an opportunistic pathogen, where *aphA-3*  
100 appears to have recombined into a different multi-drug resistance cluster, CTnHyb<sup>29,30</sup>. Further,  
101 *B. fragilis* was the only non-rumen sequence found with an additional highly conserved region  
102 and is the most closely related organism phylogenetically to the three genomes sourced from the  
103 rumen. Taken together, the version of *aadE-sat4-aphA-3* identified in rumen *Bacteroides* is  
104 highly-conserved in diverse human pathogens, was therefore likely recently horizontally  
105 transferred and the loss of transposases, only observed in the pathogenic isolates, implies  
106 stabilization of the cluster outside of the rumen. We then sought to gain more evolutionary  
107 insight into the individual ARDs within the cluster.  
108

109 Since genes are the units of evolution and proliferation for mobile traits, we attempted to analyze  
110 the evolutionary history of a single enzyme within the cluster. We focused on AadE (also known  
111 as ANT(6)), an enzyme characterized to be involved in streptomycin resistance, as it is known to  
112 have diverse homologues with the same activity and streptomycin resistance has been long  
113 observed in the rumen<sup>31,32</sup>. For instance, in 1966, a range of rumen isolates were screened against  
114 various antibiotics and the only compound that demonstrated resistance in all cases was  
115 streptomycin<sup>32</sup>. We used 1354 homologues of AadE from the NCBI non-redundant (nr) protein  
116 sequences database to build a gene tree (Figure 2)<sup>33,34</sup>. The majority of the homologues (78%)  
117 came from Firmicutes, where AadEs likely originated, followed by the Bacteroidetes (13%)<sup>31</sup>.  
118 The taxonomic origin of the remaining sequences was diverse and interestingly, despite the fact  
119 that only 7% of the sequences derive from the rumen microbiome, they span much of the  
120 diversity represented in the NCBI nr database (Figure 2). This indicates that the rumen has been  
121 exposed to a large and diverse gene pool with respect to sequences homologous to AadE. Then,  
122 we noticed that a sub-clade (clade 7) contained both the AadE from the *aadE-sat4-aphA-3*  
123 cluster, as well as a homologous variant from the same rumen *Bacteroides* genome (*Bacteroides*  
124 *thetaitaomicron* nale-zl-c202 (Hungate collection 4309680)) (Figure 2). These two variants  
125 were annotated as ANT(6)-Ia (AadE-Ia) and ANT(6)-Ib (AadE-Ib), respectively. As these two  
126 enzymes are thought to have the same activity, we were interested to see how the horizontal  
127 transfer of *aadE-Ib* compared with that of *aadE-Ia*<sup>31</sup>. To do so, we carried out the same type of  
128 analysis as shown in Figure 1, but instead analyzed the *aadE-Ib* containing contig from the *B.*  
129 *thetaitaomicron* nale-zl-c202 (Figure 3, Table S2). In this case, *aadE-Ib* was widely distributed  
130 in pathogens and commensal bacteria, albeit with lower nucleotide identities as compared to  
131 *aadE-Ia* (81.3-100%) and seems to be transferred alone or with a different aminoglycoside O-  
132 nucleotidyltransferase (*aad9* or ANT(9)) (Figure 3, Table S3). Considering that the most closely  
133 related sequences to *aadE-Ib* are not as conserved and not exclusively found in pathogens, this  
134 gene is likely not under as strong of selection as *aadE-Ia*. It is however recombining in context  
135 with other ARDs. For example, it was found to recombine near Tet(O) in *C. coli* SX8, a gene  
136 which is also highly conserved in several ruminal bacteria at the nucleotide level (Figure 3B,  
137 Figure S1A). When looking at further syntenic regions, AadE-Ib was often found in context of

138 AadE-Ia and the *aadE-sat4-aphA-3* cluster. We therefore were interested to further compare  
139 AadE-Ia and AadE-Ib across many environments and bacterial genomes and better understand  
140 how these two variants may have emerged.

141  
142 By building a gene tree with all protein sequences within clade 7, shown in Figure 2, we  
143 observed four clear sub groups that each corresponded to a different annotated version of AadE  
144 (Figure 4A). Outside of bacteria from the rumen or pathogens, the two groups representing  
145 AadE-Ia and AadE-Ib contained sequences that were mostly sourced from various animal or  
146 human intestinal samples (Figure 4A). Moreover, the sequences from the rumen tended to span  
147 these two groups, whereas the sequences from the two more deeply branching sub groups,  
148 containing ANT(6)-Id (AadE-Id) and ANT(6)-Ic (AadE-Ic), were mostly sourced from diverse  
149 environmental samples, such as plants and soil (Figure 4A, Table S4). This may not be surprising  
150 in light of several genomic analyses of the transfer of horizontal resistance, which have pointed  
151 to the gut as an interconnection between soil and clinical pathogens or found that farm animal  
152 microbiomes are enriched for transfer events with human-associated bacteria<sup>2,11</sup>. This does  
153 however point more specifically to the rumen as a link between the environment and the human  
154 or animal intestinal tract. Two questions that then arise are: why did these two variants, AadE-Ia  
155 and AadE-Ib, emerge evolutionarily and why are they both often present in a single genome (e.g.  
156 *B. thetaiotaomicron* nale-zl-c202)? Especially considering that the characterized versions have  
157 the same activity<sup>31</sup>. When looking at those genomes that were selected for sharing high  
158 nucleotide identity with the *aadE-Ia* or *aadE-Ib* from *B. thetaiotaomicron* nale-zl-c202, several  
159 of them were also found to have both or multiple copies of AadE (Figure 4B and Figure 4C). By  
160 comparing their identity and synteny, it is clear that several AadEs have arisen via gene  
161 duplication events and often remained in context of each other (Figure 4B and Figure C).  
162 Interestingly, outside of the *aadE-sat4-aphA-3*, the genes found in context of the two AadEs are  
163 mostly streptomycin or aminoglycoside modifying enzymes (Figure 4B and Figure C). Other  
164 ARDs in context include tetracycline and lincosamide resistance genes, which are also heavily  
165 represented in the rumen and act on compounds produced by *Streptomyces* (Table S1, Table S5,  
166 Figure S1). It is interesting to note, although often observed with other ARDs, that AadE-Ia and  
167 AadE-Ib further recombine into clusters with genes which would theoretically yield the same  
168 resistance phenotype. A logical suggestion is that aminoglycoside producing bacteria from soil  
169 are also the sources of AR, and that these genes may have served modifying roles outside of  
170 resistance to the toxicity of the compounds<sup>35-37</sup>. Altogether, it is possible that recombining  
171 variants of *aadE* from the environment further duplicated, potentially including the events that  
172 spawned AadE-Ia and AadE-Ib, adapted, and refined their syntenic context in the rumen. During  
173 the process, there were likely many subsequent transfer events, often with commensal bacteria of  
174 the intestinal tract of humans and other animals.

175  
176 In terms of food-producing animals, aminoglycosides accounted for 3.5% of the total sales of  
177 antimicrobials in 2015 and are most frequently used to treat infections<sup>38</sup>. Considering the  
178 diversity of homologues of aminoglycoside inactivating or modifying enzymes and that cattle are  
179 not directly fed aminoglycosides, it is worth considering that the rumen is also exposed to the  
180 compounds and an ARD gene pool via natural sources. Soil, for example, is a well characterized  
181 reservoir of antibiotic producing organisms and ARDs, which long predate the use of antibiotics,  
182 and aminoglycosides have particularly high sorption in soils<sup>8,9,39-41</sup>. Additionally, *Streptomyces*  
183 are often isolated from agricultural soils, including in the case of the discovery to streptomycin<sup>42</sup>,

184 as well as from feed sources such as hay directly<sup>43</sup>. The rumen takes in enormous amount of feed  
185 and in various ways, it has been shown to provide favourable conditions for genetic exchange<sup>44–</sup>  
186 <sup>46</sup>. Considering that ecology shapes gene exchange, it is reasonable to assume that the rumen, a  
187 100-200L anaerobic bioreactor constantly interfacing with the feed containing a diversity of  
188 antibiotic related compounds and the microorganisms producing them, provides an opportunity  
189 for a ARD gene pool to exchange and adapt within an animal associated microbiome and  
190 environment. While streptomycin is not regularly detected in feed, other compounds produced by  
191 *Streptomyces*, which are easier to detect, such as chloramphenicol, are found regularly<sup>47</sup>.  
192 Ultimately, a wide range of aminoglycoside modifying enzymes sourced from soils or sediments  
193 may be transferred to and refined the rumen, especially in terms of genetic synteny, before being  
194 spread throughout the farm and potentially strongly selected or co-selected for when treating an  
195 animal infection or when a field is contaminated with antibiotics (Figure S2)<sup>48</sup>. In terms of  
196 spreading throughout the farm, the humans, whose associated microbes show 25 fold more HGT  
197 as compared to non-human isolates, in contact with the animals are the most obvious conduit<sup>2</sup>. It  
198 was however also interesting to find a common dog pathogen (*Staphylococcus*  
199 *pseudointermedius*) in the analysis which contained the highly conserved *aadE-sat4-aphA-3*  
200 cluster (Figure 1A). Overall, we observed recent horizontal transfer events of ARDs between  
201 ruminal bacteria, farm animals, pets and pathogens infecting humans, whose history of assembly  
202 points towards the rumen as the source. Therefore, while only one of many sources of AR, the  
203 rumen should be considered an environment with high potential for generating clusters of ARDs  
204 and providing a central link to other reservoirs, especially on the farm, before going on to create  
205 problems in the clinic. If further evidence corroborates this suggestion, antibiotic discovery  
206 efforts could focus on antibiotic compounds from organisms that evolved in environments with  
207 little or no connection to agricultural feed.

208

## 209 FIGURE LEGENDS

210

211 Figure 1. A. Aligned regions from nucleotide blast comparisons of the most similar sequences  
212 from NCBI to three rumen contigs (see Table S1) compared to a *Prevotella* sp. metagenome  
213 assembled genome (MAG)(RUG782) contig. B. Gene diagram comparison between 2 rumen  
214 sourced and 2 pathogen bacterial genomes to show conservation of genetic synteny from a few  
215 selected examples. Gene numbering maps to annotations in Table S3 and grey connections  
216 between genes represent homologues.

217

218 Figure 2. A. Maximum likelihood phylogenetic tree using the top 1354 most similar sequences to  
219 AadE-V1 from both the rumen database and NCBI nr with lengths between 250 and 350 amino  
220 acids. Clades are numbered for reference. Pie charts show the distribution of phyla from which  
221 the sequences were obtained. Numbers within the pie charts indicate how many sequences make  
222 up the clade. Clade 7 contains ANT(6)-Ia (AadE-Ia) and ANT(6)-Ib (AadE-Ib) from *B.*  
223 *thetaitaomicron* nale-zl-c202.

224

225 Figure 3. A. Aligned regions from nucleotide blast comparisons of the most similar sequences  
226 from NCBI to a single rumen contig (see Table S1) compared to a *B. thetaiotaomicron* nale-zl-  
227 c202 genome (Hungate collection 4309680) contig. B. Gene diagram comparison between a  
228 rumen sourced and 2 pathogenic organism genomes to show conservation of genetic synteny

229 from a few selected examples. Gene numbering maps to annotations in Table S3 and grey  
230 connections between genes represent homologues.

231  
232 Figure 4. A. A maximum likelihood tree using all sequences falling within clade 7 (Figure 2).  
233 Ultrafast bootstrap values are shown and sequences in bold are from the Hungate 1000  
234 collection. Clades are labelled based on containing specific variants of AadE. The outgroup used  
235 was a randomly selected sequence taken from clade 22 in Figure 2. B and C. Each point around  
236 the circle is an antibiotic resistance determined (ARD) coloured by the contig containing it. A  
237 contig is represented if the genome was used in Figure 1 or Figure 3 and contained two or more  
238 AadE. An ARD is shown if it is annotated as AadE-Ia or AadE-Ib or another annotated ARD that  
239 is syntenic with one of the AadE variants (within a resistance cluster). B. Connections show  
240 amino acid identity with AadE-Ib from *B. thetaiotaomicron* nale-zl-c202 (Hungate collection  
241 4309680). C. Connections show amino acid identity with AadE-Ia from *B. thetaiotaomicron*  
242 nale-zl-c202 (Hungate collection 4309680). Genes are labelled if they are annotated as AadE-Ib,  
243 AadE-Ia, part of the *aadE-sat4-aphA-3* cluster or annotated to act on aminoglycosides. Other  
244 ARDs present in the resistance cassettes are shown in Table S5.

245  
246 Figure S1. A. Aligned regions from nucleotide blast comparisons of rumen bacterial genomes to  
247 a *C. coli* (JQ655275)(A) and *Erysipelothrix rhusiopathiae* (KP339868)(B) genome.

248  
249 Figure S2. Graphical overview of a scenario where the rumen plays a predominant role in  
250 connecting soils and crops, harboring the organisms who produce antibiotics and have evolved  
251 ARDs, to the rest of the farm. It is suggested that the rumen provides a significant opportunity  
252 for ARDs to transfer into an animal associated microbiome, recombine and adapt before being  
253 spread throughout the farm, where the resulting antibiotic resistance cassettes are (co-) selected  
254 for in treating human or animal pathogens.

255  
256 METHODS

257  
258 Comparative analysis of *aadE-sat4-aphA-3* and *aadE-Ib*

259  
260 Genome sequences from the Hungate1000 project, including those listed as previously  
261 published, were combined with MAGs from Steward *et al.*<sup>15,16</sup>. Using a concatenated fasta file  
262 containing all genome and MAG nucleotide sequences, ORFs were predicted using prodigal  
263 v2.6.3<sup>49</sup>. The resulting ORFs were then blasted against the CARD using local blastp v2.9.0+<sup>50</sup>.  
264 The 3 contigs (Hungate collection 4309689\_79 and 43809680\_52, MAG RUG782\_1) which  
265 coded for the top 6 blast hits, in terms of bitscore, were then blasted against the NCBI nucleotide  
266 collection (nr/nt) using web-based blastn and the full-length sequence for each of the top 50 hits  
267 was downloaded<sup>33,34</sup>. After removing identical sequences, a total of 54 sequences were used in  
268 the downstream analysis, the accession numbers and descriptions for which are listed in Table  
269 S2. Each of the downloaded sequences was then blasted against the rumen sourced *Prevotella* sp.  
270 contig (RUG782\_1) using local blastn 2.9.0+<sup>50</sup>. A sequence was displayed in Figure 1A if the  
271 total combined length of alignments was over 4000 bp for each query and the percent identity of  
272 the alignment was over 80%. For the gene diagrams displayed in Figure 1B, annotations from up  
273 to 10 of the top blastp hits from the NCBI non-redundant protein sequences database are listed in  
274 Table S3<sup>33,34</sup>. The same was done for Figure 3A, except starting with the contig from *B.*

275 *thetaitoamicron* nale-zl-c202 genome (43809680\_59) containing *aadE-Ib*. Again, top 50 hits  
276 from the NCBI nucleotide collection (nr/nt) were downloaded (Table S2) and subsequently  
277 blasted against the rumen *B. thetaitoamicron* contig (43809680\_59). Here, a sequence was  
278 displayed in Figure 3A if the total combined length of alignments was over 1000 bp and the  
279 percent identity of the alignments were over 80%.

280

## 281 Phylogenetic and syntenic analysis of AadE

282

283 The predicted ORF for AadE from the 3 selected rumen contigs (Hungate collection  
284 4309689\_79 and 43809680\_52, MAG RUG782\_1), being identical ORFs, was blasted against  
285 the NCBI non-redundant protein sequences database<sup>33,34</sup>. All hits with an e-value below 1e-4  
286 were downloaded. Sequences were further eliminated if the length was below 250 bp or above  
287 350 bp and an initial alignment was then made using MUSCLE (including the following flags: -  
288 maxiters 3 -diags -sv -distance1 kbit20\_3)<sup>51</sup>. This alignment was inspected using Geneious  
289 v9.1.8, trimmed to between position 64 and 609, and further refined using the default setting  
290 from MUSCLE, while allowing for up to 50 iterations<sup>51,52</sup>. The phylogenetic tree shown in  
291 Figure 2 was subsequently constructed FastTree on the default settings<sup>53</sup>. In terms of  
292 visualization, clades were collapsed whose average branch length to the leaves was below 1.5  
293 using the interactive tree of life (iTOL) online tool<sup>54</sup>. The resulting tree is down in Figure 2.

294

295 The tree shown in Figure 4A was constructed using the sequences extracted from clade 7 in  
296 Figure 2, with the addition of any homologues of AadE-Ia or AadE-Ib (>200 amino acids and  
297 >60% identity to the two versions from *B. thetaitoamicron* nale-zl-c202 when compared using  
298 local blastp 2.9.0+) from the genomes used in Figure 1 and 3, if they contained multiple copies  
299 of the homologues<sup>50</sup>. The sequences were aligned using MUSCLE with 50 iterations, inspected  
300 using Geneious v9.1.8, and trimmed to between positions 25 and 305. Moreover, truncated  
301 proteins were removed, resulting in an alignment of 156 sequences, which was again refined  
302 using MUSCLE. This was then used as the input file for IQ-TREE using the standard settings  
303 with the following flags: -m TEST -bb 1000 -alrt 1000. An Le Gascuel (LG) model was selected  
304 using Gamma with 4 categories for the rate of heterogeneity<sup>55-57</sup>. The resulting tree, along with  
305 ultrafast bootstrap values, was visualized using iTOL.

306

307 To analyze synteny, any ORFs annotated as ARDs surrounding the AadE-Ia or AadE-Ib  
308 homologues (within maximum ~50kB) that were taken from the genomes used in Figure 1 and 3  
309 are shown in Figure 4B and C. These were compared to AadE-Ib (Figure 4B) AadE-Ia (Figure  
310 4C) or using local blastp 2.9.0+<sup>50</sup>. The annotation based on the top blastp hits from the NCBI  
311 non-redundant protein sequences database are listed in Table S5<sup>33,34</sup>.

312

313

## 314 ACKNOWLEDGMENTS

315

316 The competence centre FFoQSI is funded by the Austrian ministries BMVIT, BMDW and the  
317 Austrian provinces Niederoesterreich, Upper Austria and Vienna within the scope of COMET -  
318 Competence Centers for Excellent Technologies. The programme COMET is handled by the  
319 Austrian Research Promotion Agency FFG (Oesterreichische  
320 Forschungsförderungsgesellschaft). This work was conducted within the COMET-Project

321 D4Dairy (Digitalisation, Data integration, Detection and Decision support in Dairying, Project  
322 number: 872039).

323

324 REFERENCES

325

- 326 1. Davies, J. Origins and evolution of antibiotic resistance. *Microbiologia* 12, 9–16 (1996).
- 327 2. Smillie, C. S. *et al.* Ecology drives a global network of gene exchange connecting the  
328 human microbiome. *Nature* 480, 241–244 (2011).
- 329 3. Wright, G. D. Antibiotic resistance in the environment: A link to the clinic? *Current*  
330 *Opinion in Microbiology* (2010). doi:10.1016/j.mib.2010.08.005
- 331 4. Organization, W. H. *Antimicrobial resistance: global report on surveillance. WHO Report*  
332 (2014). doi:1.4.2014
- 333 5. Brown, E. D. & Wright, G. D. Antibacterial drug discovery in the resistance era. *Nature*  
334 (2016). doi:10.1038/nature17042
- 335 6. Blaskovich, M. A. T., Zuegg, J., Elliott, A. G. & Cooper, M. A. Helping Chemists  
336 Discover New Antibiotics. *ACS Infectious Diseases* (2016).  
337 doi:10.1021/acsinfecdis.5b00044
- 338 7. Krause, K. M., Serio, A. W., Kane, T. R. & Connolly, L. E. Aminoglycosides : An  
339 Overview. *Cold Spring Harb. Perspect Med.* (2016) 6(6): a027029.
- 340 8. Ling, L. L. *et al.* A new antibiotic kills pathogens without detectable resistance. *Nature*  
341 (2015). doi:10.1038/nature14098
- 342 9. Perry, J., Waglechner, N. & Wright, G. The prehistory of antibiotic resistance. *Cold*  
343 *Spring Harb. Perspect. Med.* (2016). doi:10.1101/cshperspect.a025197
- 344 10. Strachan, C. R. & Davies, J. The whys and wherefores of antibiotic resistance. *Cold*  
345 *Spring Harb. Perspect. Med.* (2017). doi:10.1101/cshperspect.a025171
- 346 11. Forsberg, K. J. *et al.* The shared antibiotic resistome of soil bacteria and human  
347 pathogens. *Science (80-. ).* (2012). doi:10.1126/science.1220761
- 348 12. Hitch, T. C. A., Thomas, B. J., Friedersdorff, J. C. A., Ougham, H. & Creevey, C. J. Deep  
349 sequence analysis reveals the ovine rumen as a reservoir of antibiotic resistance genes.  
350 *Environmental Pollution* 235, 571–575 (2018).
- 351 13. Noyes, N. R. *et al.* Resistome diversity in cattle and the environment decreases during  
352 beef production. *Elife* (2016). doi:10.7554/elife.13195
- 353 14. Muñoz, A. R. *et al.* Toward unrestricted use of public genomic data. *Science (80-. ).* 363,  
354 350–352 (2019).
- 355 15. Stewart, R. D. *et al.* Assembly of 913 microbial genomes from metagenomic sequencing  
356 of the cow rumen. *Nat. Commun.* 9, 1–11 (2018).
- 357 16. Seshadri, R. *et al.* Cultivation and sequencing of rumen microbiome members from the  
358 Hungate1000 Collection. *Nat. Biotechnol.* 36, 359–367 (2018).
- 359 17. Jia, B. *et al.* CARD 2017: Expansion and model-centric curation of the comprehensive  
360 antibiotic resistance database. *Nucleic Acids Res.* (2017). doi:10.1093/nar/gkw1004
- 361 18. Werner, G., Hildebrandt, B. & Witte, W. Aminoglycoside-streptothricin resistance gene  
362 cluster aadE-sat4-aphA-3 disseminated among multiresistant isolates of *Enterococcus*  
363 *faecium*. *Antimicrob. Agents Chemother.* (2001). doi:10.1128/AAC.45.11.3267-3269.2001
- 364 19. Derbise, A., Aubert, S. & El Solh, N. Mapping the regions carrying the three contiguous  
365 antibiotic resistance genes aadE, sat4, and aphA-3 in the genomes of staphylococci.  
366 *Antimicrob. Agents Chemother.* (1997).



- 367 20. Qin, S. *et al.* Identification of a novel genomic island conferring resistance to multiple  
368 aminoglycoside antibiotics in *Campylobacter coli*. *Antimicrob. Agents Chemother.* (2012).  
369 doi:10.1128/aac.00809-12
- 370 21. Werner, G., Hildebrandt, B. & Witte, W. Linkage of erm(B) and aadE-sat4-aphA-3 in  
371 multiple-resistant *Enterococcus faecium* isolates of different ecological origins. *Microb.*  
372 *Drug Resist.* (2003). doi:10.1089/107662903322541847
- 373 22. Derbise, A., De Cespedes, G. & El Solh, N. Nucleotide sequence of the *Staphylococcus*  
374 *aureus* transposon, Tn5405, carrying aminoglycosides resistance genes. *J. Basic*  
375 *Microbiol.* (1997). doi:10.1002/jobm.3620370511
- 376 23. Gómez-Sanz, E., Torres, C., Lozano, C., Sáenz, Y. & Zarazaga, M. Detection and  
377 characterization of methicillin-resistant *Staphylococcus pseudintermedius* in healthy dogs  
378 in La Rioja, Spain. *Comp. Immunol. Microbiol. Infect. Dis.* (2011).  
379 doi:10.1016/j.cimid.2011.08.002
- 380 24. Zhang, A. *et al.* Presence and new genetic environment of pleuromutilin-lincosamide-  
381 streptogramin A resistance gene lsa(E) in *Erysipelothrix rhusiopathiae* of swine origin.  
382 *Vet. Microbiol.* (2015). doi:10.1016/j.vetmic.2015.02.014
- 383 25. Mikalsen, T. *et al.* Investigating the mobilome in clinically important lineages of  
384 *Enterococcus faecium* and *Enterococcus faecalis*. *BMC Genomics* (2015).  
385 doi:10.1186/s12864-015-1407-6
- 386 26. Ben Zakour, N. L., Beatson, S. A., van den Broek, A. H. M., Thoday, K. L. & Fitzgerald,  
387 J. R. Comparative genomics of the *Staphylococcus intermedius* group of animal  
388 pathogens. *Front. Cell. Infect. Microbiol.* (2012). doi:10.3389/fcimb.2012.00044
- 389 27. McCarthy, A. J. *et al.* Genomic insights into the rapid emergence and evolution of MDR  
390 in *Staphylococcus pseudintermedius*. *J. Antimicrob. Chemother.* (2014).  
391 doi:10.1093/jac/dku496
- 392 28. Nguyen, M. & Vedantam, G. Mobile genetic elements in the genus *Bacteroides*, and their  
393 mechanism(s) of dissemination. *Mob. Genet. Elements* (2012).  
394 doi:10.4161/mge.1.3.18448
- 395 29. Husain, F. *et al.* The ellis island effect. *Mob. Genet. Elements* (2014).  
396 doi:10.4161/mge.29801
- 397 30. Niestępski, S. *et al.* The emergence of antimicrobial resistance in environmental strains of  
398 the *Bacteroides fragilis* group. *Environ. Int.* 124, 408–419 (2019).
- 399 31. Ramirez, M. S. & Tolmasky, M. E. Aminoglycoside modifying enzymes. *Drug Resist.*  
400 *Updat.* (2010). doi:10.1016/j.drug.2010.08.003
- 401 32. Godesberg, B. Effect of antibiotics on some rumen and intestinal bacteria. 2, 1046–1047  
402 (1966).
- 403 33. Johnson, M. *et al.* NCBI BLAST: a better web interface. *Nucleic Acids Res.* (2008).  
404 doi:10.1093/nar/gkn201
- 405 34. Boratyn, G. M. *et al.* BLAST: a more efficient report with usability improvements.  
406 *Nucleic Acids Res.* (2013). doi:10.1093/nar/gkt282
- 407 35. Davies, J. Bacterial resistance to aminoglycoside antibiotics. *J. Infect. Dis.* (1971).  
408 doi:10.1093/infdis/124.Supplement\_1.S7
- 409 36. Yim, G., Wang, H. H. & Davies, J. Antibiotics as signalling molecules. *Philosophical*  
410 *Transactions of the Royal Society B: Biological Sciences* (2007).  
411 doi:10.1098/rstb.2007.2044
- 412 37. Strachan, C. R. & Davies, J. Antibiotics and evolution: food for thought. *J. Ind. Microbiol.*

- 413 *Biotechnol.* 43, 149–153 (2016).
- 414 38. 4 Reflection paper on use of aminoglycosides in animals in 5 the European Union:  
415 development of resistance and 6 impact on human and animal health. *Eropean Med.*  
416 *Agency* (2017).
- 417 39. Lau, C. H.-F., van Engelen, K., Gordon, S., Renaud, J. & Topp, E. Novel antibiotic  
418 resistance determinants from agricultural soil exposed to antibiotics widely used in human  
419 medicine and animal farming. *Appl. Environ. Microbiol.* (2017). doi:10.1128/aem.00989-  
420 17
- 421 40. Dcosta, V. M. *et al.* Antibiotic resistance is ancient. *Nature* (2011).  
422 doi:10.1038/nature10388
- 423 41. Thiele-Bruhn, S. Pharmaceutical antibiotic compounds in soils - A review. *J. Plant Nutr.*  
424 *Soil Sci.* (2003). doi:10.1002/jpln.200390023
- 425 42. Wainwright, M. Streptomycin: discovery and resultant controversy. *Hist. Philos. Life Sci.*  
426 (1991).
- 427 43. Reboux, G. *et al.* Impact of agricultural practices on microbiology of hay, silage and flour  
428 on finnish and French farms. *Ann. Agric. Environ. Med.* (2006).
- 429 44. Allen, M. S., Bradford, B. J. & Harvatine, K. J. The cow as a model to study food intake  
430 regulation. *Annu. Rev. Nutr.* (2005). doi:10.1146/annurev.nutr.25.050304.092704
- 431 45. Duggan, P. S., Chambers, P. A., Heritage, J. & Forbes, J. M. Survival of free DNA  
432 encoding antibiotic resistance from transgenic maize and the transformation activity of  
433 DNA in ovine saliva, ovine rumen fluid and silage effluent. *FEMS Microbiol. Lett.* (2000).  
434 doi:10.1016/S0378-1097(00)00372-4
- 435 46. Mizan, S., Lee, M. D., Harmon, B. G., Tkalcic, S. & Maurer, J. J. Acquisition of antibiotic  
436 resistance plasmids by Enterohemorrhagic *Escherichia coli* O157:H7 within rumen fluid.  
437 *J. Food Prot.* (2016). doi:10.4315/0362-028x-65.6.1038
- 438 47. Berendsen, B. *et al.* Occurrence of chloramphenicol in crops through natural production  
439 by bacteria in soil. *J. Agric. Food Chem.* (2013). doi:10.1021/jf400570c
- 440 48. Scherer, A., Vogt, H. R., Vilei, E. M., Frey, J. & Perreten, V. Enhanced antibiotic multi-  
441 resistance in nasal and faecal bacteria after agricultural use of streptomycin. *Environ.*  
442 *Microbiol.* (2013). doi:10.1111/1462-2920.12028
- 443 49. Hyatt, D. *et al.* Prodigal: Prokaryotic gene recognition and translation initiation site  
444 identification. *BMC Bioinformatics* (2010). doi:10.1186/1471-2105-11-119
- 445 50. Camacho, C. *et al.* BLAST+: architecture and applications. *BMC Bioinformatics* (2009).  
446 doi:10.1186/1471-2105-10-421
- 447 51. Edgar, R. C. MUSCLE: multiple sequence alignment with high accuracy and high  
448 throughput. *Nucleic Acids Res.* (2004). doi:10.1093/nar/gkh340
- 449 52. Kearse, M. *et al.* Geneious Basic: An integrated and extendable desktop software platform  
450 for the organization and analysis of sequence data. *Bioinformatics* (2012).  
451 doi:10.1093/bioinformatics/bts199
- 452 53. Price, M. N., Dehal, P. S. & Arkin, A. P. FastTree 2 - Approximately maximum-  
453 likelihood trees for large alignments. *PLoS One* (2010).  
454 doi:10.1371/journal.pone.0009490
- 455 54. Letunic, I. & Bork, P. Interactive tree of life (iTOL) v3: an online tool for the display and  
456 annotation of phylogenetic and other trees. *Nucleic Acids Res.* (2016).  
457 doi:10.1093/nar/gkw290
- 458 55. Kalyaanamoorthy, S., Minh, B. Q., Wong, T. K. F., Von Haeseler, A. & Jermini, L. S.

- 459 ModelFinder: Fast model selection for accurate phylogenetic estimates. *Nat. Methods*  
460 (2017). doi:10.1038/nmeth.4285
- 461 56. Nguyen, L. T., Schmidt, H. A., Von Haeseler, A. & Minh, B. Q. IQ-TREE: A fast and  
462 effective stochastic algorithm for estimating maximum-likelihood phylogenies. *Mol. Biol.*  
463 *Evol.* (2015). doi:10.1093/molbev/msu300
- 464 57. Hoang, D. T., Chernomor, O., Von Haeseler, A., Minh, B. Q. & Vinh, L. S. UFBoot2:  
465 Improving the ultrafast bootstrap approximation. *Mol. Biol. Evol.* (2018).  
466 doi:10.1093/molbev/msx281  
467

# Figure 1

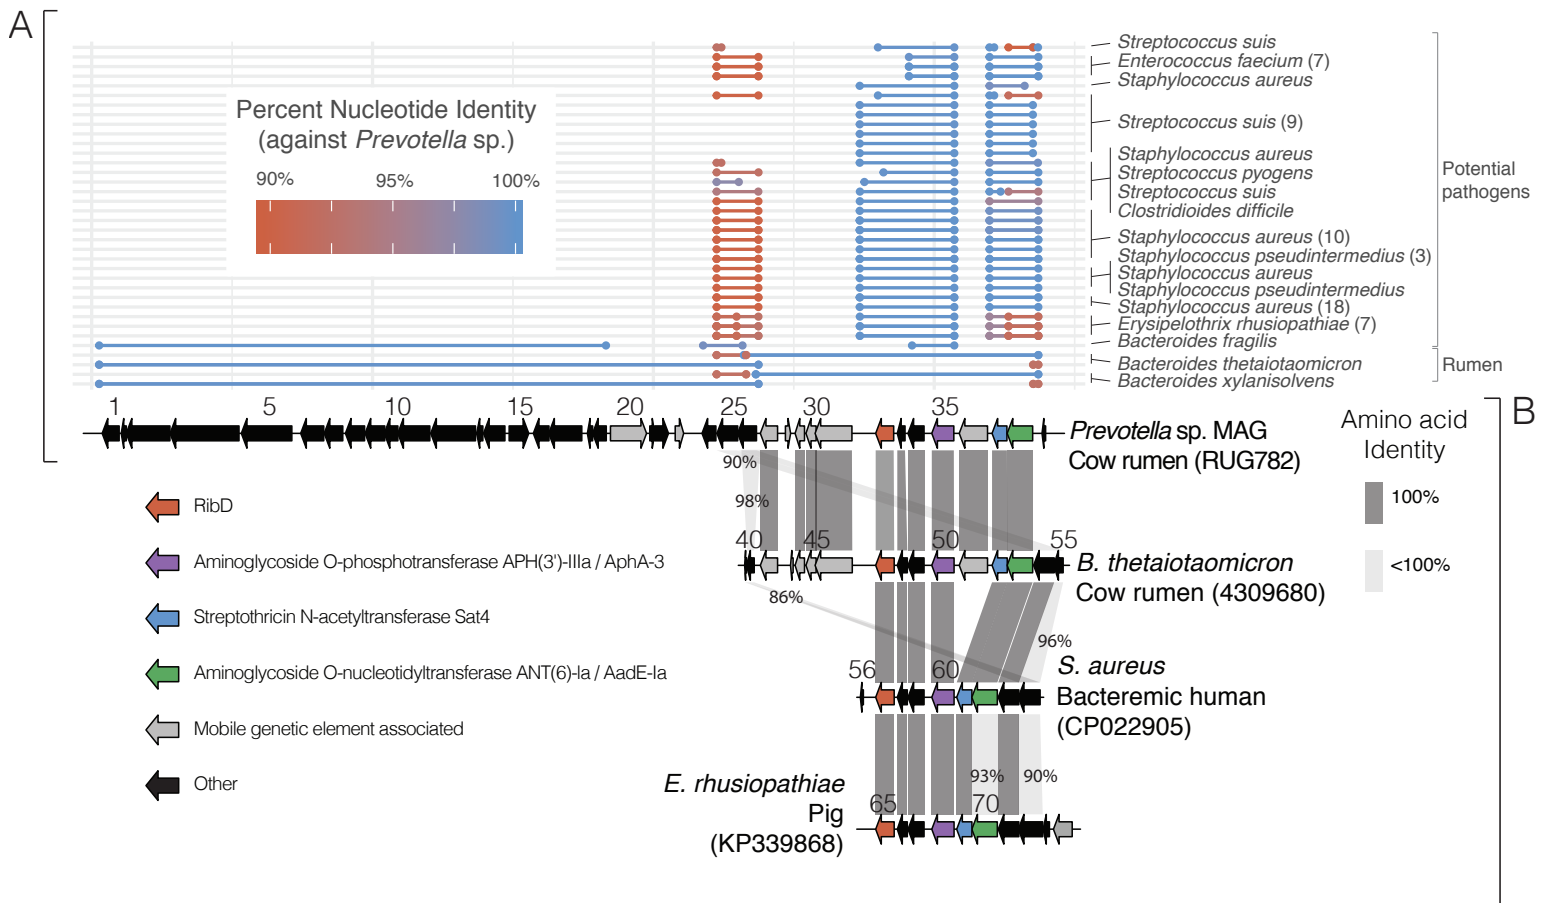

# Figure 2

▲ Rumen sequence containing

▲ Contains ANT(6)-Ia and ANT(6)-Ib from *B. thetaiotaomicron* (4309680)

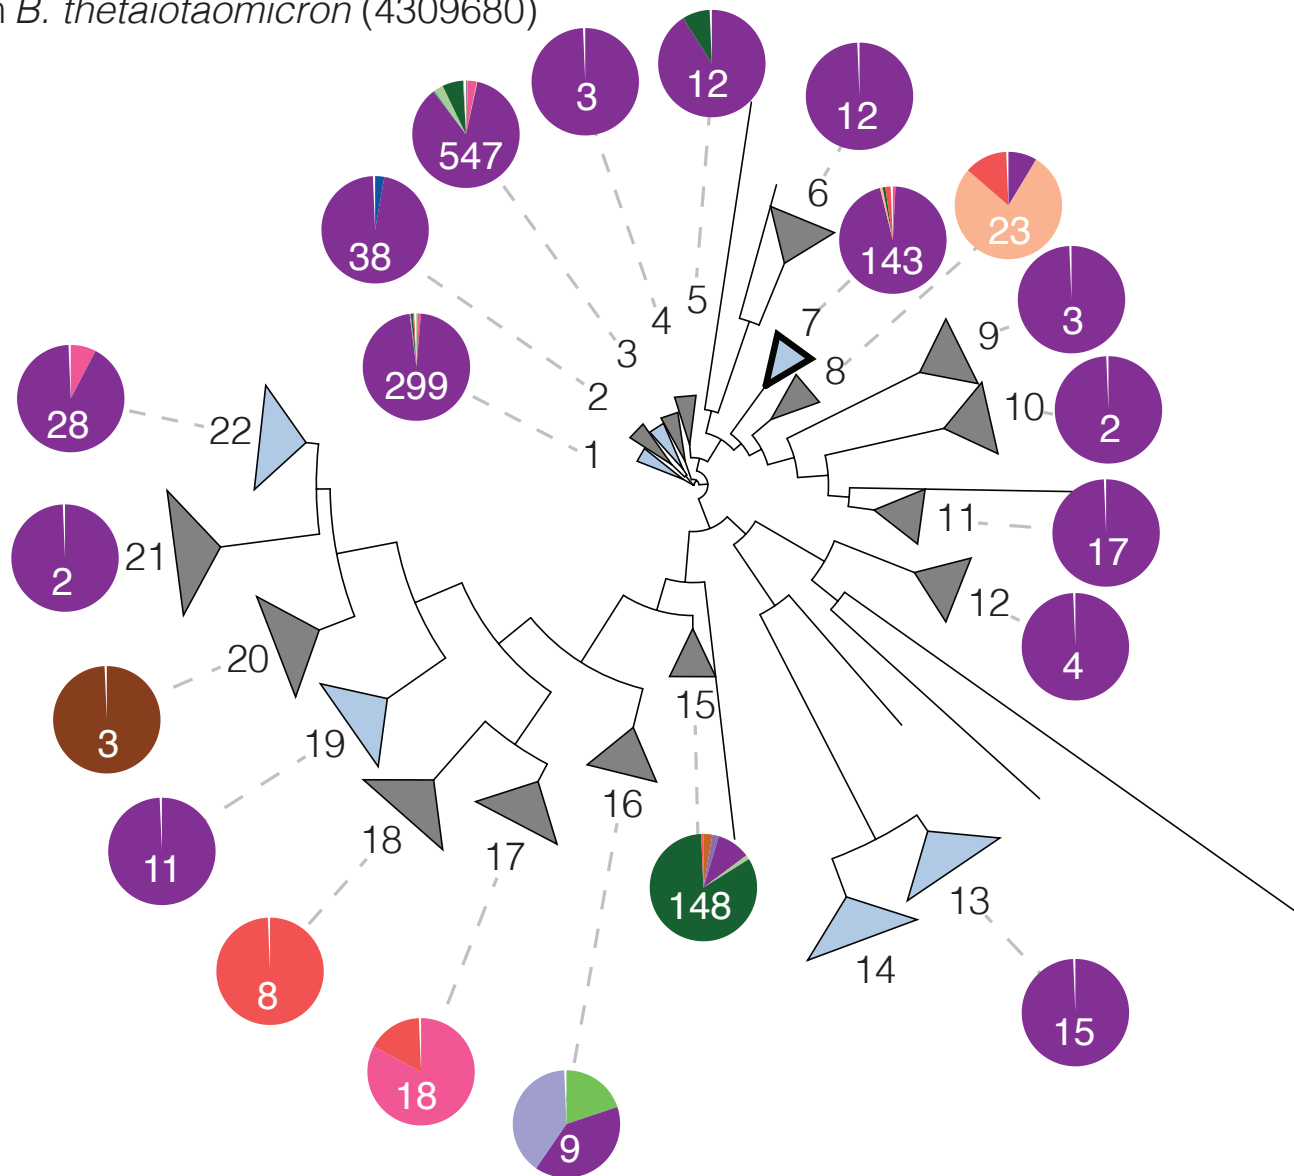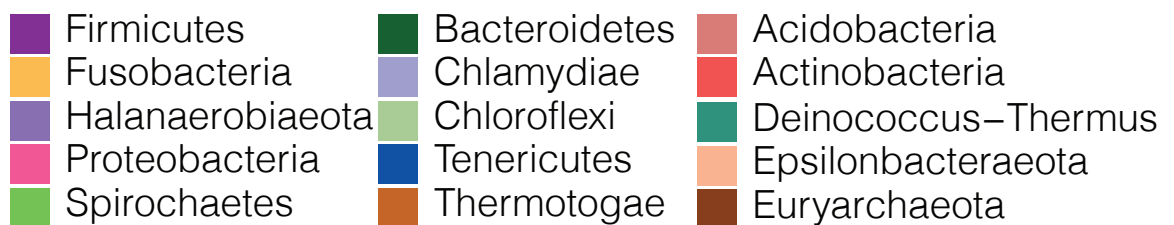

## Figure 3

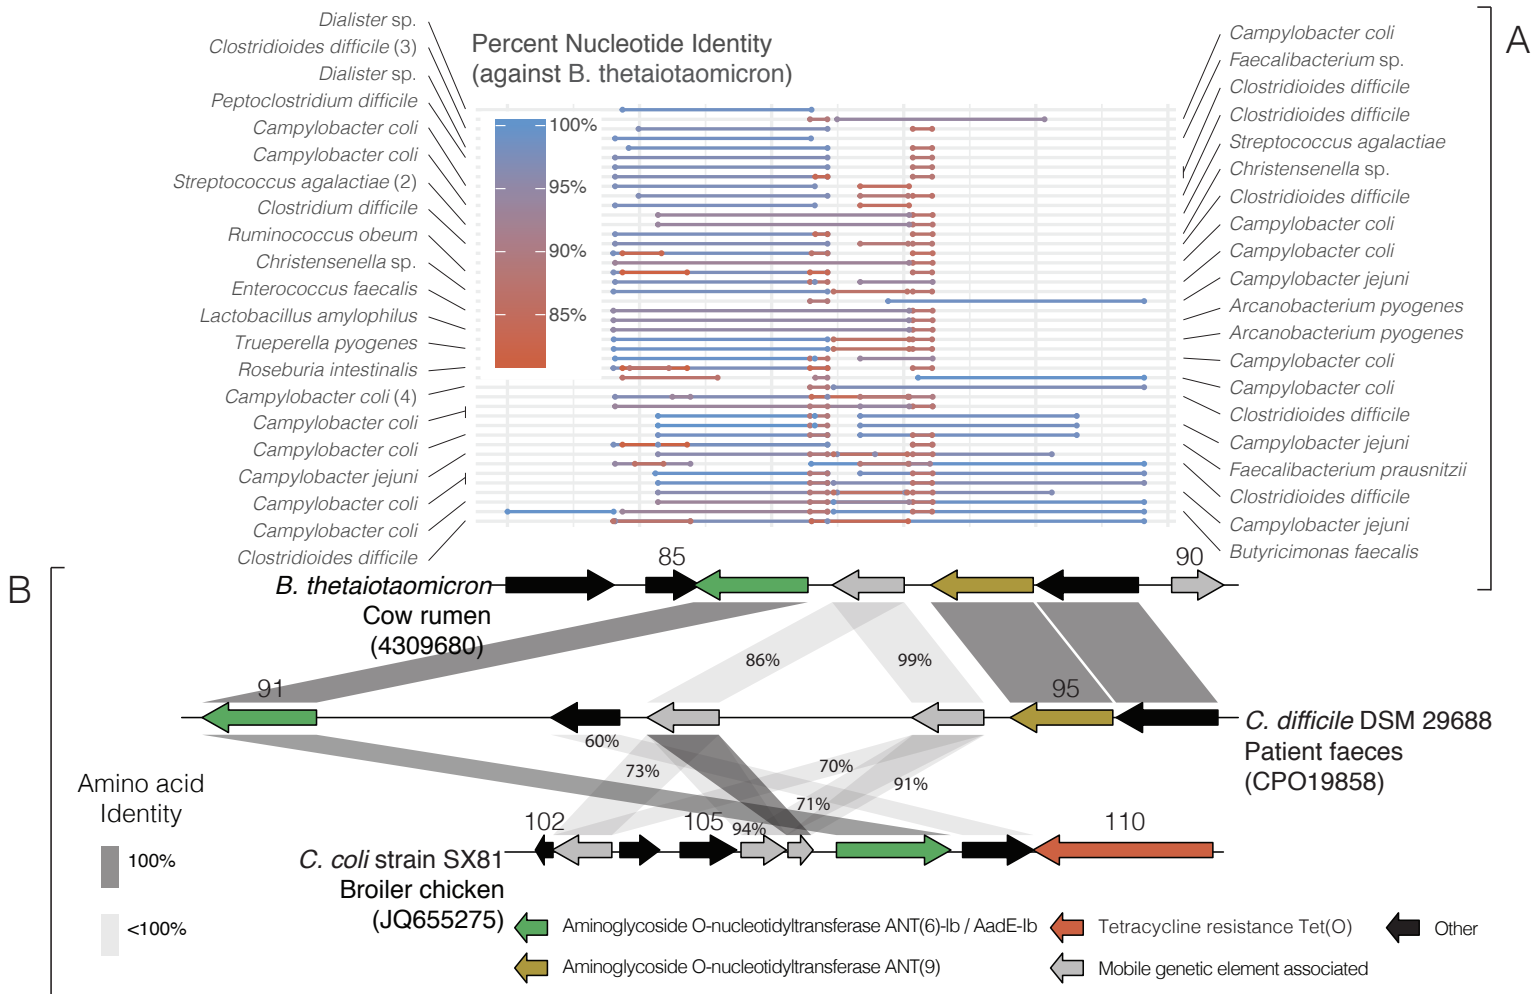

# Figure 4

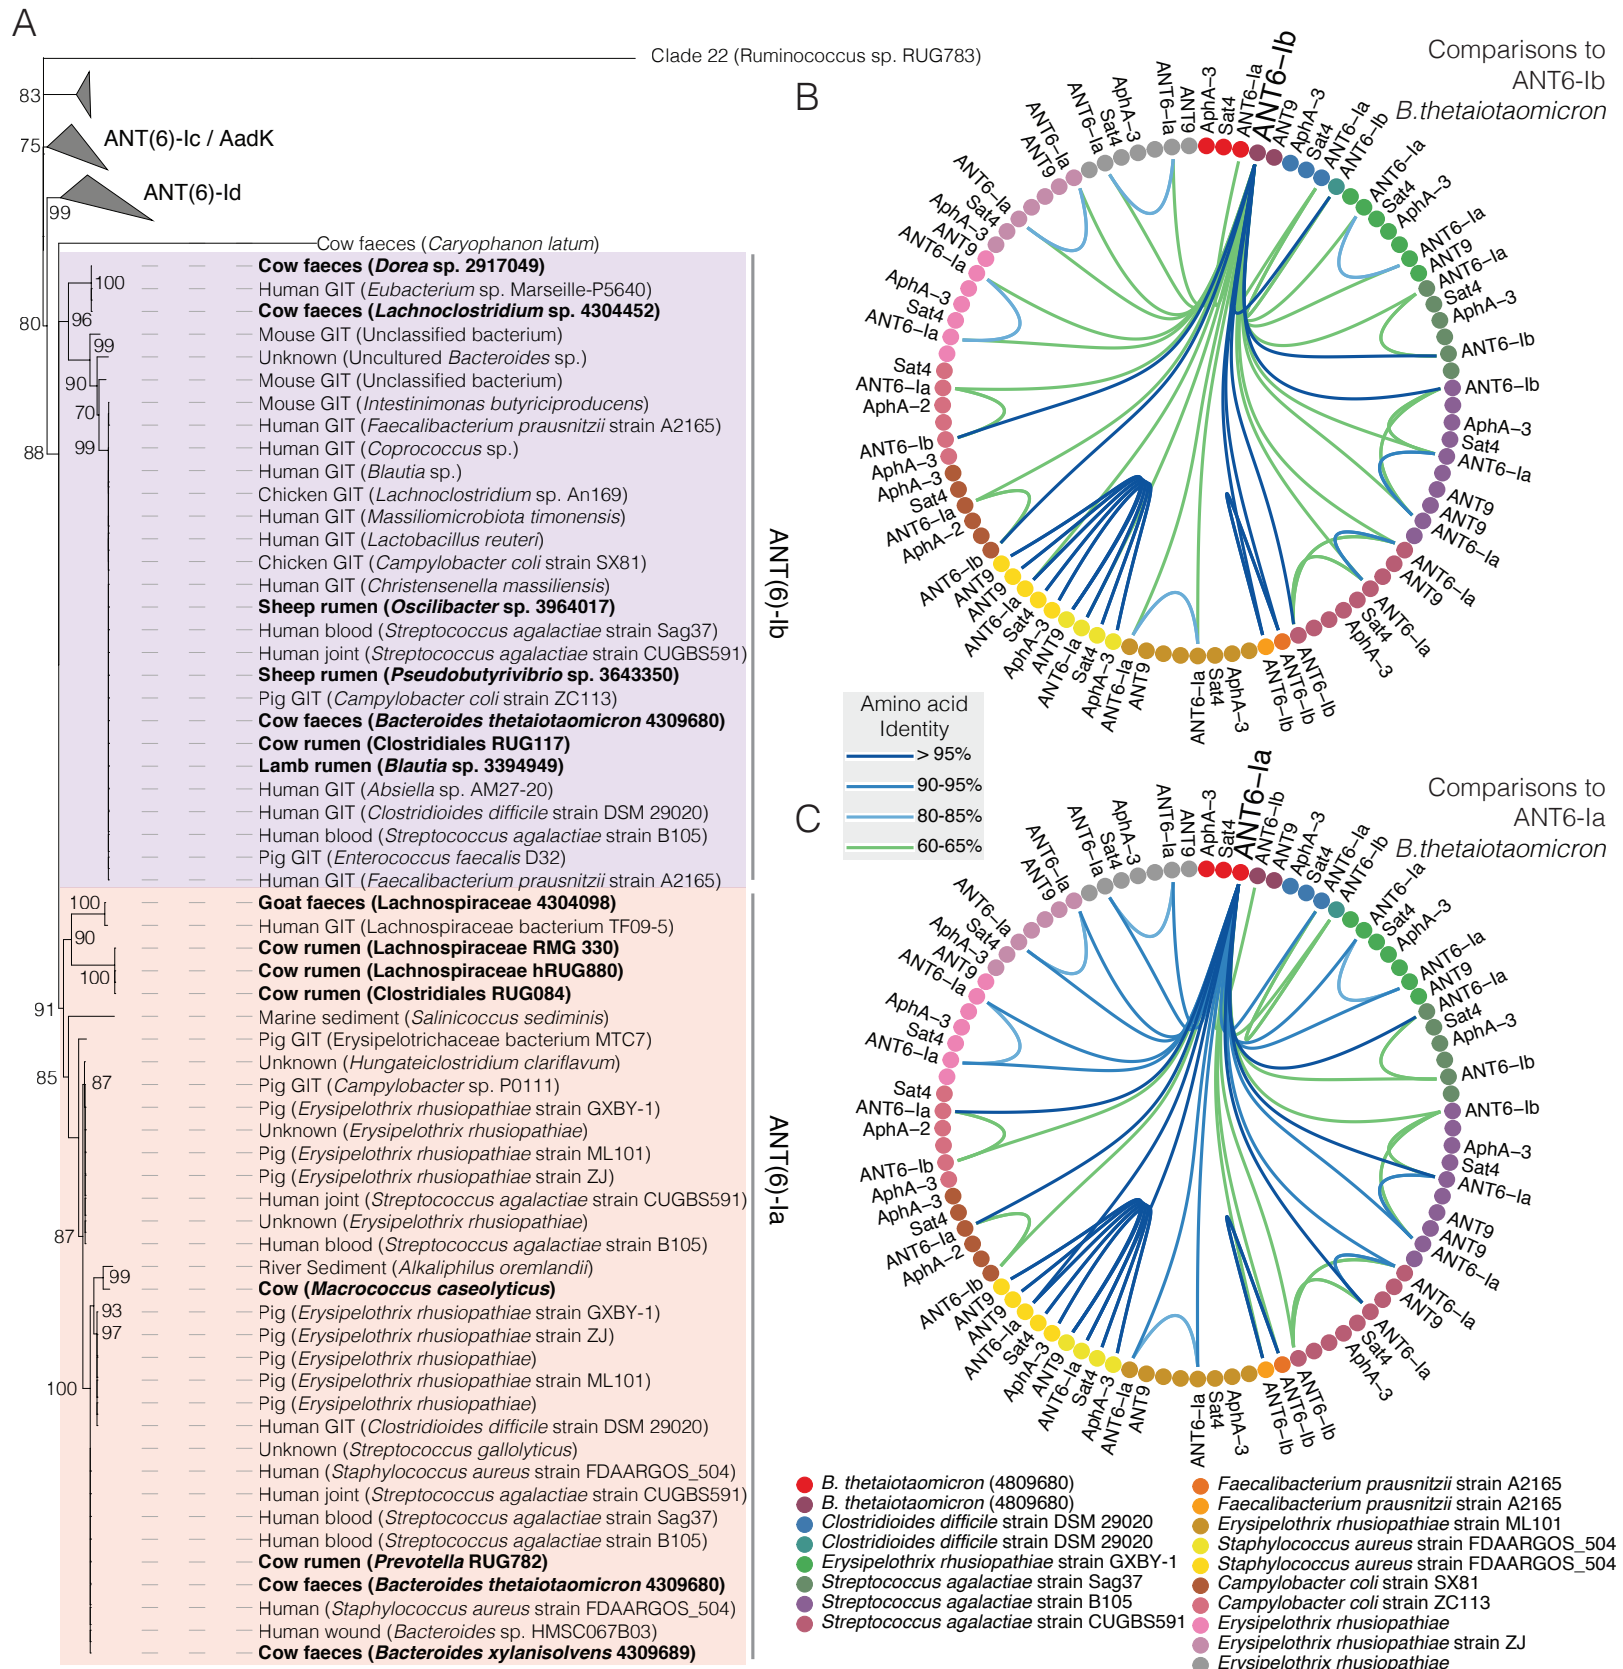

Figure S1

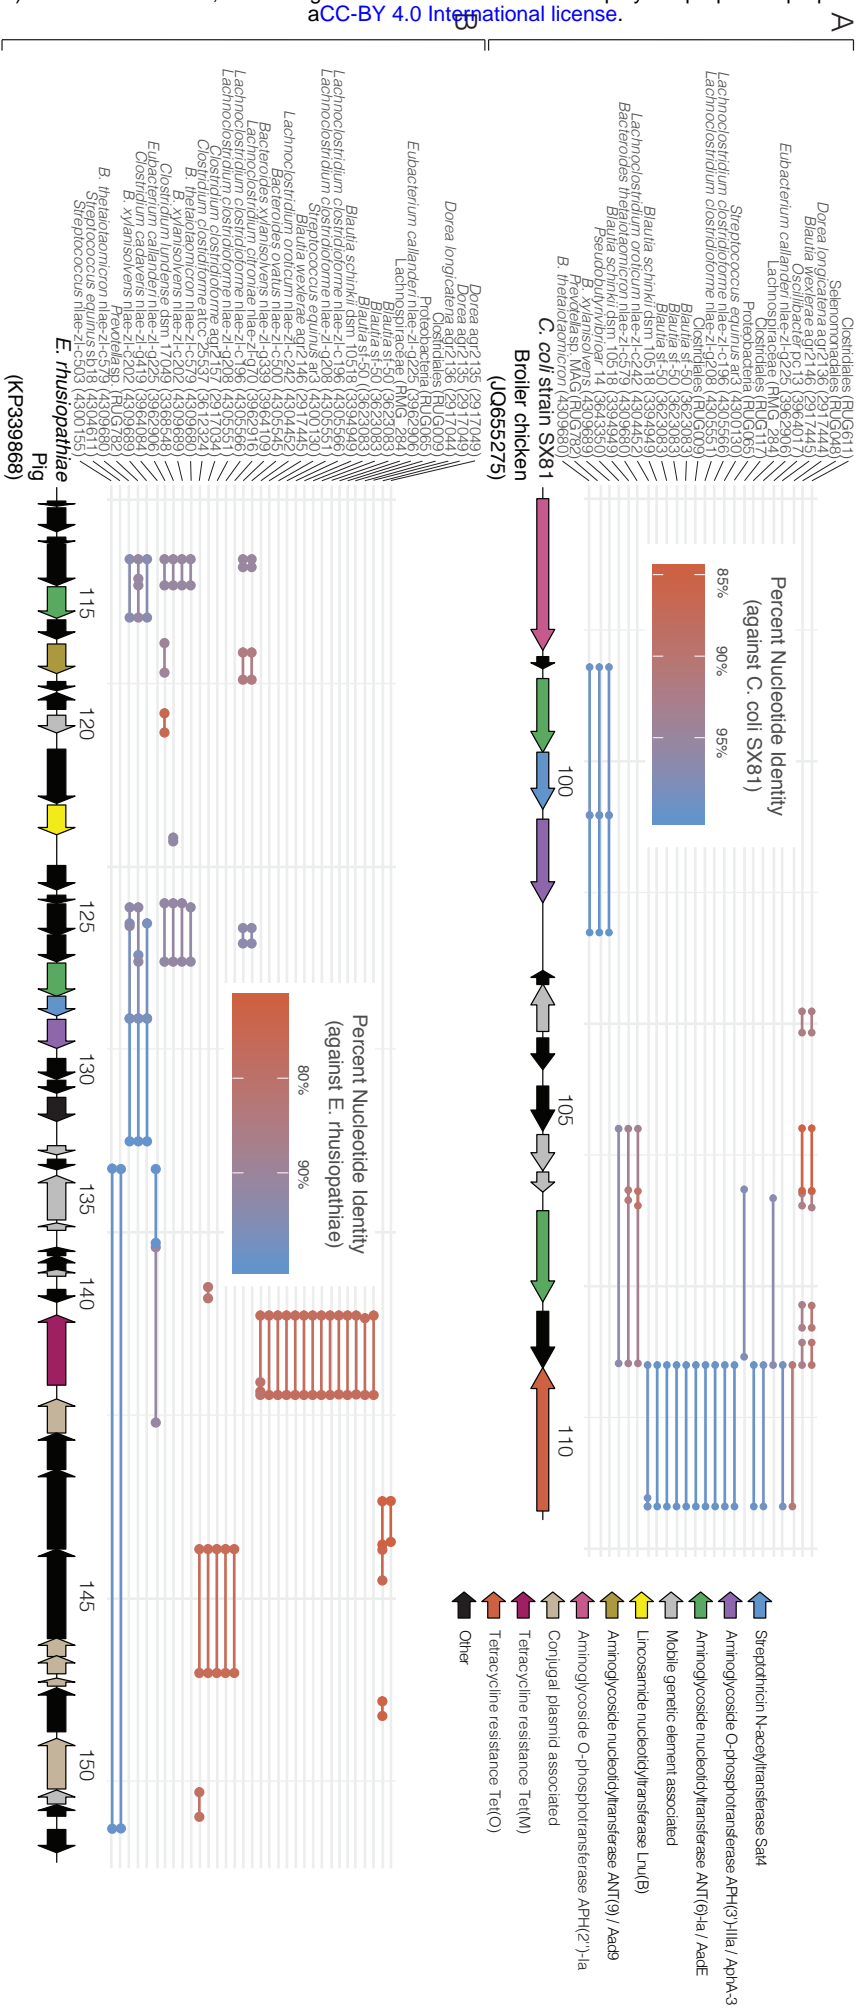



## Figure S2

B. ARDs diversify, recombine and adapt predominantly in the rumen - an animal associated microbiome constantly exposed to soils and crops.

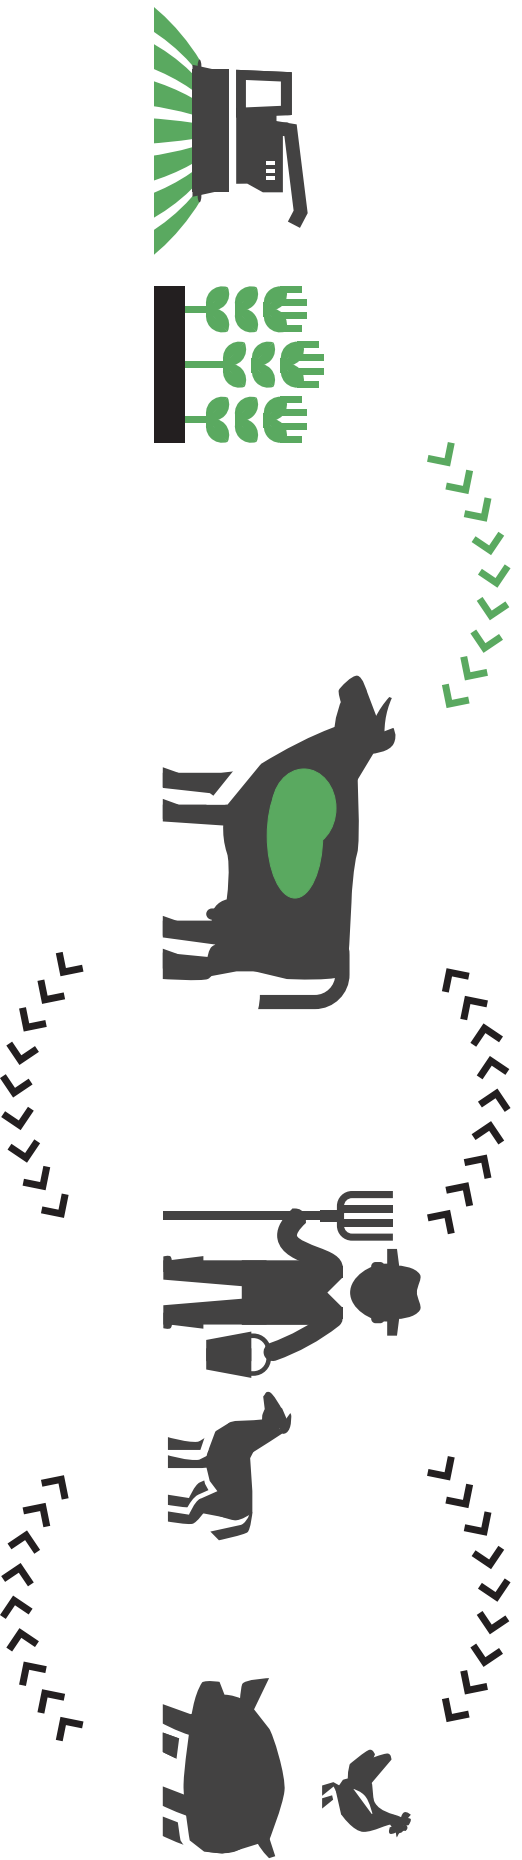

Soils and crops harbour organisms containing the original ARDs.

C. ARDs transfer throughout the farm via humans and pets. Here, the treatment of disease can result in the strong (co-) selection and stabilization (ex. gene loss and/or further recruitment) of antibiotic resistance clusters originally sourced from the rumen.
